# Supplementary material for: Molecular Bases of Heat Stress Responses in Vegetable Crops With Focusing on Heat Shock Factors and Heat Shock Proteins
Source: Frontiers journal article supplement (doi:10.3389/fpls.2022.837152), 2022-04-11
Supplement: Table_1.DOCX [file Table_1.DOCX]

**Table 1. Five major families of heat shock proteins and their major function under heat stress conditions**

| **HSP family/**  **MW (kDa)** | **Subcellular location** | **Major functions under heat stress conditions** | **Major domain** |
| --- | --- | --- | --- |
| HSP100/  100-104 | Cytosol  Mitochondria Chloroplast | Disaggregation of proteins and involvement in protein degradation (Mishra and Grover, 2016). | NTD (N-terminal domain)  NBD (Nucleotide binding domain)  MD (Middle domain) |
| HSP90/  80-94 | Cytosol  ER  Nucleus  Mitochondria  Chloroplast | Protein folding, signal transduction (most of the substrates of HSP90s are kinases and transcription factors) (Kadota and Shirasu, 2012). | NTD  MD  CTD (C-terminal domain) |
| HSP70/  68-75 | Cytosol  ER  Mitochondria  Chloroplast | Assisting folding and refolding of nonnative proteins to block protein degradation in the ER and protein import and translocation (Shiber and Ravid, 2014). | NBD  SBD (Substrate binding domain) |
| HSP60/  57-60 | Mitochondria  Cytosol  ER  Nucleus  Chloroplast | Assisting folding and refolding of unfolded polypeptides in the mitochondrial matrix (Martin et al., 1992;Caruso Bavisotto et al., 2020). | ED (Equatorial domain) AD (Apical domain) ID (Intermediate domain) |
| sHSPs/  15-42 | Cytosol  ER  Mitochondria  Chloroplast  Membrane | Preventing aggregation and refolding of unfolded polypeptides (Waters and Vierling, 2020). | NTD  ACD (Alpha-crystallin domain)  CTD |
