# Supplementary material for: Molecular Bases of Heat Stress Responses in Vegetable Crops With Focusing on Heat Shock Factors and Heat Shock Proteins
Source: Frontiers journal article supplement (doi:10.3389/fpls.2022.837152), 2022-04-11
Supplement: Table_2.DOCX [file Table_2.DOCX]

**Table 2. Gene expression pattern response to heat or cold stress in vegetables.**

| **Vegetables** | **Gene/ protein** | **Expression pattern** | | **Tissue** | **Description** | **Ref.** |
| --- | --- | --- | --- | --- | --- | --- |
| **Heat (H)** | **Cold (C)** |
| Tomato (*Solanum  lycopersicum)* | *SlHSP100* | Up |  | H: leaves | Upregulation detected in both thermotolerant and thermosensitive lines under HS | (Gul et al., 2021) |
| HSP70  sHSP | Up | *Up (H🡪C) | H/C: fruits | Protein levels of HSPs were increased under HS.  *Increased protein levels at HT remained high for several weeks even when transferred to low temperatures. | (Sabehat et al., 1996) |
| *SlHSP20* | Up/ Down |  |  | Expression of 13 of all tested *SlHsp20* genes was drastically increased in both thermotolerant and thermosensitive lines under HS, except for *SlHsp15.7.* | (Yu et al., 2016) |
| *HSFA2  Hsp17-CII* | Up |  | H: flower | The highest induction of two genes was identified in the anther tissues under HS. | (Giorno et al., 2010) |
| *tom111*  (homolog from pea *HSP21*), *tom66,*  (homolog from pea *HSP18.1*) | Up | *Up  (H🡪C) | H: fruit, flower, leaves, stems  C: Mature-green fruits | The expression of *tom 111* and *tom66* was induced by HT.  *The expression was first decreased and re-induced after the heated organs were transferred to low temperature. | (Sabehat et al., 1998) |
| *LeHSP17.6* | Up | *Up  (H🡪C) | H/C: fruits | Fruits with heating-and-chilling treatment showed a high level of  expression of *LeHSP17.6.* | (Kadyrzhanova et al., 1998) |
| Pepper (*Capsicum  annuum*) | *CaHSP70* | Up/  Down |  | H: leaves | Expression of *HSP70* gene was highly upregulated in the thermotolerant line compared to the thermosensitive line under HS. | (Usman et al., 2015) |
| *CaHSP60* | Up/  Down | Up | H/C: leaves, stems, roots | Fifteen (93% of total *CaHSP60* genes) *CaHSP60* genes were upregulated under HS and cold stress, and only *CaHSP60-3* was downregulated in both thermosensitive B6 and thermotolerant R9 lines. | (Haq et al., 2019) |
| *CaHSP20* | Up/  Down |  | H: leaves, stems, roots, flowers | Generally, the peaks of expression levels of *CaHsp20* genes in the thermosensitive line B6 were higher than the thermotolerant line R9. | (Guo et al., 2015) |
| *CaHSP16.4* | Up |  | H: leaves, roots | Theexpression level of *CaHsp25.9* was higher in leaves than that in roots, and was highest at 2 h after HS in both thermosensitive B6 and thermotolerant R9 lines. | (Feng et al., 2019) |
| Soybean (*Glycine max)* | *GmHSP90* | Up |  | H: leaves | A significant upregulation was observed in 12 *GmHsp90* genes within 30 min at 42℃ | (Xu et al., 2013) |
| *GmHSP70* | Up/ Down |  | H: leaves | 29 genes out of 61 detectable *GmHSP70s* showed upregulation under drought and HS conditions. | (Zhang et al., 2015) |
| *GmHSP20* | Up | Up | C: leaves | 47 soybean *Hsp20* genes were responsive to heat shock stress, and 5 were also induced by cold stress. | (Lopes-Caitar et al., 2013) |
| Pea (*Pisum sativum*) | *HSP70*  *PsHSFA* | Up |  | H: leaves,  cotyledons | The expression of *PsHSFA* and *HSP70* was induced in both leaves and cotyledons under HS. | (Aranda et al., 1999) |
| *HSP17.9*  *HSP18.1* | Up |  | H: leaves | The expression of *HSP17.9* and *HSP18.1* was highly upregulated at the beginning of HS, and declined rapidly after the stress. | (DeRocher et al., 1991) |
| Potato (*Solanum*  *tuberosum)* | 18 kDa sHSP | Up |  | H: leaves | The 18 kDa sHSP proteins were induced longer in the heat tolerant cultivars than the heat sensitive cultivars. | (Ahn et al., 2004) |
| HSP100 HSP90 HSP80 HSP70 sHSP |  | Up  (during chilling storage) | C: tuber | Fifteen *HSPs* genes, including *HSP100*, *HSP90*, *HSP80*, *HSP70* and *sHSP* family were consistently upregulated by low temperatures in both RNA and protein levels, which may act to prevent cellular damage from cold stress in potato tubers during postharvest storage. | (Lin et al., 2019) |
| Lettuce (*Lactuca sativa*) | *HSP70* | Up |  | H: leaves, stems | HT induced the expression of a gene encoding HSP70 that interacts with a calmodulin for heat induced bolting tolerance. | (Liu et al., 2020a) |
| *HSP70 sHSP* | Up |  | H: leaves | The *sHSP* and *HSP70* genes were quickly and sharply induced within 1 h treatment of HS. | (Kang et al., 2021) |
