# Supplementary material for: Molecular Bases of Heat Stress Responses in Vegetable Crops With Focusing on Heat Shock Factors and Heat Shock Proteins
Source: Frontiers journal article supplement (doi:10.3389/fpls.2022.837152), 2022-04-11
Supplement: Table_3.DOCX [file Table_3.DOCX]

**Table 3. Engineering temperature stress tolerance in plants**

| **Transgenic plant** | **Stress** | **Gene**  **targeted/ transferred** | **Gene**  **expression/**  **manipulation** | **Result** | **Ref.** |
| --- | --- | --- | --- | --- | --- |
| *Arabidopsis* | Heat | *AtHSP101* | Down regulation / Antisense inhibition or co-suppression | Decreased heat tolerance. | (Queitsch et al., 2000) |
| *AtHSF1* | Overexpression of *AtHSF1*-GUS and GUS-*AtHSF1* | Increased *HSP18* expression level at normal temperatures and enhanced basic thermotolerance. | (Lee et al., 1995) |
| *CaHSP25.9*  From pepper | Overexpression | Increased heat tolerance.  Reduced accumulation of reactive oxygen species (ROS). | (Feng et al., 2019) |
| *CaHSP70*  from pepper | Overexpression | Increased heat tolerance including basal thermotolerance and acquired thermotolerance. | (Guo et al., 2016b) |
| *PfHSP21.4*  fromPrimula | Overexpression | Increased thermotolerance activity.  Increased antioxidant enzymes such as ascorbate peroxidase (APX). | (Zhang et al., 2014) |
| *TaHSP26*  from wheat | Overexpression | Increased thermotolerance.  Increased photosynthetic pigments, higher biomass, and seed yield. | (CHAUHAN et al., 2012) |
| Down-regulation / Antisense inhibition | Showed negligible thermotolerance. |
| *LimHSP16.45*  from David Lily | Overexpression of *LimHSP16.45*-GFP | Enhanced viability of *Arabidopsis* cells under HS.  Induced more superoxide dismutase (SOD) and catalase (CAT) activity. | (Mu et al., 2013) |
| Cold | CsHSP17.7  CsHSP18.1  CsHSP21.8  from *Camellia sinensis* | Overexpression | Increased root length in *Arabidopsis* under low temperature. | (Wang et al., 2017) |
| PfHSP17.2  from Forrest primrose | Overexpression | Enhanced freezing tolerance. | (Zhang et al., 2018b) |
| Tobacco | Heat | *OsHSP101*  (*ClpB-C*)  from rice | Overexpression | Increased heat tolerance. | (Chang et al., 2007) |
| *ZmHSP16.9*  from maize | Overexpression | Increased tolerance to heat and oxidative stress. | (Sun et al., 2012) |
| *LeHSP21*  from tomato | Overexpression | Increased tolerance to heat and oxidative stress. | (Zhang et al., 2016) |
| *BcHSP70*  from *Brassica campestris* | Overexpression | Increased heat tolerance.  Increased the chlorophyll content, SOD and peroxidase (POD) activities. | (Wang et al., 2016b) |
| Cold | *CaHSP26*  from sweet pepper | Overexpression | Protected PSII and PSI from chilling stress. | (Guo et al., 2007) |
| *CaHSP22.5*  from pepper | Overexpression | Improved the tolerance of chilling stress.  Increased the activity of reactive oxygen species-scavenging enzymes. | (Li et al., 2018) |
| Rice | Heat | *AtHSP101* (*ClpB-C*) | Overexpression | Increased heat tolerance. | (Katiyar-Agarwal et al., 2003) |
| *OsHSP18.6* | Overexpression | Increased heat tolerance.  Exhibited the lower levels of malondialdehyde (MDA) and greater CAT and SOD activities. | (Wang et al., 2015) |
| Tomato | Heat | *HSFA1b* (*AtHSF*  *A1b* and *β-glucuronidase* (*gusA*) fusion gene) | Overexpression | Increased heat tolerance.  Increased the activity of soluble isoforms of APX. | (Li et al., 2003) |
| *HSP24.4* | Overexpression | Increased heat tolerance.  Showed tissue specific expression in root, shoot, and stem tissue under HS. | (Mahesh et al., 2013) |
| Unknown  (*HT7* mutant) | EMS Micro-Tom mutant | Heat tolerant tomato lines.  Highly expressed *SlHSFA1b* and *SlHsp101* than WT respond to HS. | (Pham et al., 2020) |
| Cold | *CPsHSP* | Overexpression | Increased chilling tolerance. | (Wang et al., 2005) |
| *HSFA1b* (*AtHSF*  *A1b* and *gusA* fusion gene) | Overexpression | Increased chilling tolerance.  Increased the activity of soluble isoforms of APX. | (Li et al., 2003) |
| *sHSP23.8-M* | Overexpression | Protected fruit from chilling injury. | (Escobar et al., 2021) |
| Knock-down | Decreased chilling tolerance.  Showed wilting and skin wrinkles, partial discoloration. |
| *SlHSP17.7* | Overexpression | Increased tolerance response to cold stress. | (Zhang et al., 2020) |
| Potato | Heat | *DcHSP17.7*  from carrot | Overexpression | Increased cellular membrane stability and tuberization. | (Ahn and Zimmerman, 2006) |
| Pepper | Heat | *CaHSP60-6* | Down regulation/ virus-induced gene  silencing (VIGS) | Reduced heat tolerance. | (Haq et al., 2019) |
| Carrot | Heat | *HSP17.7* | Overexpression | Increased heat tolerance (with an increase of 68-90% growth). | (Malik et al., 1999) |
| Down-regulation / Antisense inhibition | Decreased heat tolerance (with a decrease of 12-26% growth). |
| Soybean | Heat | *GmHsp90A2* | Overexpression | Increased heat tolerance.  Reduced chlorophyll loss and stabilized membrane systems. | (Huang et al., 2019) |
| Knockout/ CRISPR/Cas9 | Reduced heat tolerance. |
